# Supplementary material
Source: MDPI journal article supplement (https://www.mdpi.com/2032-6653/13/6/105)
Supplement: s1 [file s1]

Archive with 1 entries (1 files):
- wevj-1658639-supplementary.pdf
