# Supplementary material
Source: MDPI journal article supplement (https://www.mdpi.com/2032-6653/13/6/105)
Supplement: s1 [file s1 › wevj-1658639-supplementary.pdf]

## Supporting Information

### Section S1: Information about the dataset used in this work

Table S1: Information Contained in the Electric Vehicle (EV) Dataset

| Feature Category           | Feature                                                                                         |
|----------------------------|-------------------------------------------------------------------------------------------------|
| Model Specifications       | Name                                                                                            |
|                            | Year                                                                                            |
|                            | Market (e.g., China, North America, Europe)                                                     |
|                            | Price                                                                                           |
|                            | Trim (if applicable)                                                                            |
|                            | Alias (if applicable)                                                                           |
| Battery Pack               | Voltage                                                                                         |
|                            | Number of Battery Modules                                                                       |
|                            | Weight                                                                                          |
|                            | Volume                                                                                          |
|                            | Cooling System/Mechanism (air convection, water-based cooling, and active thermal management) * |
|                            | Battery Type as Advertised (lithium-ion, lithium polymer)                                       |
|                            | Energy Density                                                                                  |
| Performance Specifications | Top Speed                                                                                       |
|                            | Acceleration                                                                                    |
|                            | Range                                                                                           |
|                            | Curb Weight                                                                                     |
|                            | Payload                                                                                         |
|                            | Gross Vehicle Weight Rating (GVWR)                                                              |

\* It is important to note that, while air- and water-based cooling are considered active cooling mechanisms, the dataset source might have classified the cooling mechanism as “active thermal management” in cases of insufficient or unclear information.

## Section S2: The steps for linear regression parameter estimation using bootstrapping

1. We define  $X = [x_1, \dots, x_n]^T$  and  $y = [y_1, \dots, y_n]^T$  as the vector of regressor and response variables, respectively, where  $n$  is the total number of observations. In our case,  $x$  is the vector of EV range observations according to the WLTP (or NEDC), and  $y$  is the vector of EV range observations according to the EPA. For the observations where both regressor and response variables are present (where the corresponding  $(k \times 1)$  vectors are denoted by  $X_{comp}$  and  $y_{comp}$ ), the linear regression parameter ( $\theta$ ) in  $y_{comp} = X_{comp} \theta + e$  is calculated using:

$$\theta = (X_{comp}^T X_{comp})^{-1} X_{comp} y_{comp} \quad S1$$

2. The values of  $y_{comp}$  were predicted using the relationship  $y_{comp} = X_{comp} \theta$  and are denoted by  $\hat{y}_{comp}$ . Subsequently, the residual,  $e = y_{com} - y_{comp}$ , was computed for  $k$  observations. It should be noted that there are  $(n-k)$  observations, where the response variable (EPA range) is missing. Each of the observations with a missing response variable was assigned a random calculated residual with a replacement.
3. From the assigned residual and the predicted value, the actual values of the response variables of the missing data were calculated. The bootstrapped linear regression parameter ( $\theta_b$ ) was calculated for all the observations using:

$$\theta_b = (X^T X)^{-1} X y \quad S2$$

4. Steps 2-3 were repeated 2000 times, and the average bootstrapped linear regression parameters was calculated for each iteration.

### Section S3: Relationship between ranges

$$EPA\ range = -34.721 + 1.049 * WLTP\ range \quad S3$$

$$EPA\ range = -38.9802 + 0.9703 * NEDC\ range \quad S4$$

Note: All ranges are in miles.

#### Section S4: Plots outlining trends between different variables

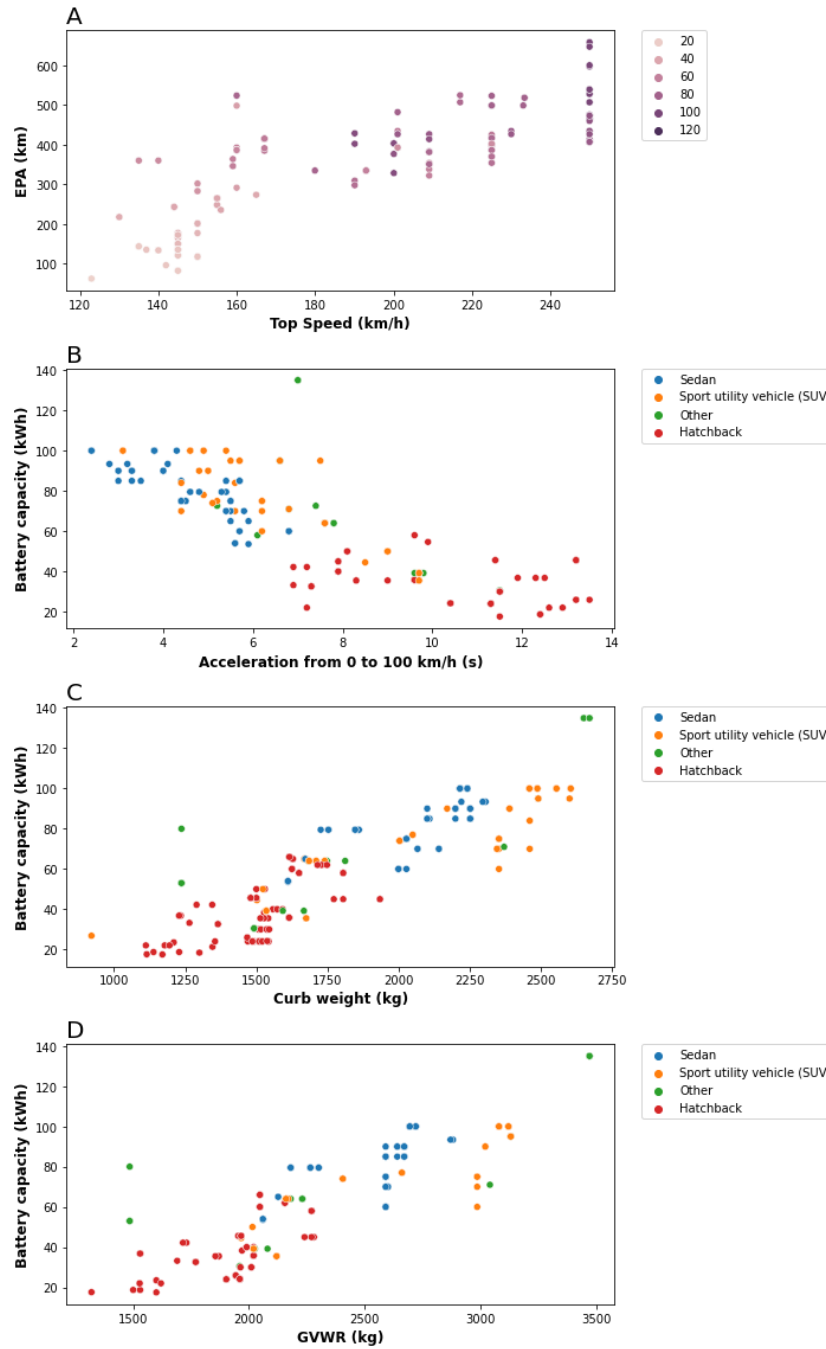

Figure S1: Scatter plots exploring different relations in the dataset. (A) top speed against its EPA range with different battery capacities, (B) acceleration against battery capacity with different body styles, (C) curb weight against battery capacity with different body styles, and (D) GVWR against battery capacity with different body styles.

### Section S5: Relationship between the EPA range and the independent variables

$$\begin{aligned}
 EPA [miles] = & -37562 + 18.6 * Model Year + 3.8 \\
 & * Battery capacity [kWh] + 0.08 \\
 & * Top Speed [mph] + 10.2 \\
 & * Acceleration (0 to 100 kmh^{-1})[s] + 0.22 \\
 & * Curb Weight [lb] - 0.19 * GVWR [lb] + a \\
 & * Battery Type + b * Cooling Mechanism + c \\
 & * Body Style
 \end{aligned}
 \tag{S5}$$

where a is equal to 12.6 when lithium polymer batteries are used and is equal to -12.6 when lithium-ion batteries are used. Similarly, b = 28.9 or -28.9 when water-based cooling or another cooling mechanism are used, respectively. Moreover, c = -5.1, -60.2, 51.8, or 13.5 when the body styles hatchback, other, sedan, or SUV are considered, respectively.

### Section S6: Model performance as calculated by various performance metrics

The following equations express the absolute mean error (MAE), mean absolute percent error (MAPE), and R-squared error (R<sup>2</sup>) used to evaluate the values in Table S2.

$$MAE = \frac{1}{m} \sum_{i=1}^m |\hat{y}_i - y_i| \tag{S6}$$

$$MAPE = \frac{1}{m} \sum_{i=1}^m \left| \frac{\hat{y}_i - y_i}{\hat{y}_i} \right| \tag{S7}$$

$$R^2 = 1 - \frac{\sum_{i=1}^m \hat{y}_i - y_i}{\sum_{i=1}^m \bar{y} - y_i} \tag{S8}$$

where  $\hat{y}_i$  and  $y_i$  denote the model predicted and actual values, respectively, and m is the total number of observations. Moreover,  $\bar{y}$ , used in Equation S8, refers to the mean values of the actual values.

Table S2: Model evaluations from MAE, MAPE, and R<sup>2</sup>

| Model                    | MAE    | MAPE  | R <sup>2</sup> |
|--------------------------|--------|-------|----------------|
| Normal Linear Regression | 23.379 | 0.067 | 0.932          |
| Ridge Regression         | 15.542 | 0.072 | 0.930          |
| Lasso Regression         | 23.570 | 0.067 | 0.932          |
| Elastic Net              | 29.674 | 0.088 | 0.913          |
| SVM Regression           | 22.367 | 0.062 | 0.939          |
